# Supplementary material
Source: MDPI journal article supplement (https://www.mdpi.com/2410-3888/8/6/292)
Supplement: s1 [file s1 › fishes-2381743-supplementary.pdf]

**Table S1.** Number of responses (*n*) and the frequency of occurrence (%) of responses about the demographics of Blue Swimmer Crabs and Black Bream fishers. Data obtained from respondents that answered all questions in the closed question online survey.

|                                              | Blue Swimmer Crab |       | Black Bream |       |
|----------------------------------------------|-------------------|-------|-------------|-------|
|                                              | <i>n</i>          | %     | <i>n</i>    | %     |
| <b>Gender</b>                                |                   |       |             |       |
| Male                                         | 298               | 83.94 | 99          | 93.40 |
| Female                                       | 55                | 15.49 | 7           | 6.60  |
| Other                                        | 2                 | 0.56  | 0           | 0.00  |
| <b>Age</b>                                   |                   |       |             |       |
| 18 - 24                                      | 30                | 8.47  | 18          | 16.98 |
| 25 - 34                                      | 66                | 18.64 | 26          | 24.53 |
| 35 - 44                                      | 96                | 27.12 | 29          | 27.36 |
| 45 - 54                                      | 70                | 19.77 | 15          | 14.15 |
| 55 - 64                                      | 53                | 14.97 | 16          | 15.09 |
| 65 or more                                   | 39                | 11.02 | 2           | 1.89  |
| <b>Education</b>                             |                   |       |             |       |
| Primary School                               | 3                 | 0.88  | 1           | 0.94  |
| Secondary School                             | 108               | 31.67 | 41          | 38.68 |
| Technical or Further educational institution | 119               | 34.90 | 31          | 29.25 |
| University or other Tertiary institution     | 111               | 32.55 | 32          | 30.19 |
| Other                                        | 0                 | 0.00  | 1           | 0.94  |
| <b>Household annual income</b>               |                   |       |             |       |
| <\$0                                         | 5                 | 1.61  | 3           | 3.06  |
| \$0                                          | 14                | 4.50  | 6           | 6.12  |
| \$1 - \$20,799                               | 20                | 6.43  | 9           | 9.18  |
| \$20,800 - \$41,599                          | 28                | 9.00  | 10          | 10.20 |
| \$41,600 - \$62,399                          | 48                | 15.43 | 10          | 10.20 |
| \$62,400 - \$83,199                          | 50                | 16.08 | 18          | 18.37 |
| \$84,000 - \$103,999                         | 32                | 10.29 | 16          | 16.33 |
| \$104,000 - \$142,999                        | 41                | 13.18 | 7           | 7.14  |
| \$143,000 - \$181,999                        | 32                | 10.29 | 6           | 6.12  |
| \$182,000 - \$233,999                        | 21                | 6.75  | 7           | 7.14  |
| \$234,000 - \$285,999                        | 5                 | 1.61  | 1           | 1.02  |
| \$286,000 - \$337,999                        | 6                 | 1.93  | 2           | 2.04  |
| > \$338,000                                  | 9                 | 2.89  | 3           | 3.06  |

**Table S2: Number of responses (*n*) and the frequency of occurrence (%) of responses about the characteristics of Blue Swimmer Crabs and Black Bream fishers.** Data obtained from respondents that answered all questions in the closed question online survey.

| Fishing frequency                                  | Blue Swimmer Crab |       | Black Bream |       |
|----------------------------------------------------|-------------------|-------|-------------|-------|
|                                                    | <i>n</i>          | %     | <i>n</i>    | %     |
| I have never been fishing for crabs*               | 10                | 1.92  | 2           | 1.40  |
| I have not fished for crabs in the past 12 months* | 33                | 6.32  | 7           | 4.90  |
| Once                                               | 46                | 8.81  | 4           | 2.80  |
| Once a month                                       | 92                | 17.62 | 27          | 18.88 |
| Once every 2 - 3 months                            | 87                | 16.67 | 16          | 11.19 |
| Once every 4 - 6 months                            | 97                | 18.58 | 7           | 4.90  |
| 1 - 2 days a fortnight                             | 107               | 20.50 | 41          | 28.67 |
| 1 - 2 days a week                                  | 35                | 6.70  | 33          | 23.08 |
| 3 - 4 days a week                                  | 12                | 2.30  | 6           | 4.20  |
| 5 days or more a week                              | 3                 | 0.57  | 0           | 0.00  |

  

| Fishing experience |          |       |          |       |
|--------------------|----------|-------|----------|-------|
|                    | <i>n</i> | %     | <i>n</i> | %     |
| 1 year or less     | 24       | 5.16  | 5        | 3.91  |
| 2 - 3 years        | 34       | 7.31  | 13       | 10.16 |
| 4 - 5 years        | 40       | 8.60  | 22       | 17.19 |
| 6 - 10 years       | 63       | 13.55 | 18       | 14.06 |
| 11 - 20 years      | 93       | 20.00 | 36       | 28.13 |
| 21 - 39 years      | 119      | 25.59 | 24       | 18.75 |
| 40 years or more   | 92       | 19.78 | 10       | 7.81  |

  

| Fishing location       |          |       |          |       |
|------------------------|----------|-------|----------|-------|
|                        | <i>n</i> | %     | <i>n</i> | %     |
| Shore                  | 124      | 26.67 | 51       | 40.16 |
| Both but usually shore | 53       | 11.40 |          |       |
| Both equally           | 34       | 7.31  |          |       |
| Both but usually boat  | 83       | 17.85 |          |       |
| Kayak                  |          |       | 31       | 24.41 |
| Boat                   | 171      | 36.77 | 38       | 29.92 |
| Other                  |          |       | 7        | 5.51  |

  

| Fishing method                             |          |                |          |       |
|--------------------------------------------|----------|----------------|----------|-------|
|                                            | <i>n</i> | % <sup>^</sup> | <i>n</i> | %     |
| Drop/crab nets                             | 372      | 79.49          |          |       |
| Scoop nets                                 | 276      | 58.97          |          |       |
| Catch by hand by diving/snorkelling/wading | 93       | 19.87          |          |       |
| Crab traps                                 | 3        | 0.64           |          |       |
| Wire hook                                  | 5        | 1.07           |          |       |
| Bait                                       |          |                | 30       | 23.08 |
| Lures (including soft plastics)            |          |                | 80       | 61.54 |
| Bait and lures                             |          |                | 18       | 13.85 |
| Other                                      |          |                | 2        | 1.54  |

  

| Skill level       |          |       |          |       |
|-------------------|----------|-------|----------|-------|
|                   | <i>n</i> | %     | <i>n</i> | %     |
| Beginner (novice) | 57       | 12.28 | 13       | 10.16 |
| Intermediate      | 235      | 50.65 | 74       | 57.81 |
| Expert            | 172      | 37.07 | 41       | 32.03 |

\* After selecting this response these respondents were automatically transferred to the final page of the questionnaire to complete some basic demographic questions and received a thank you message.

<sup>^</sup> Respondents were able to select multiple options and so value do not sum to 100.

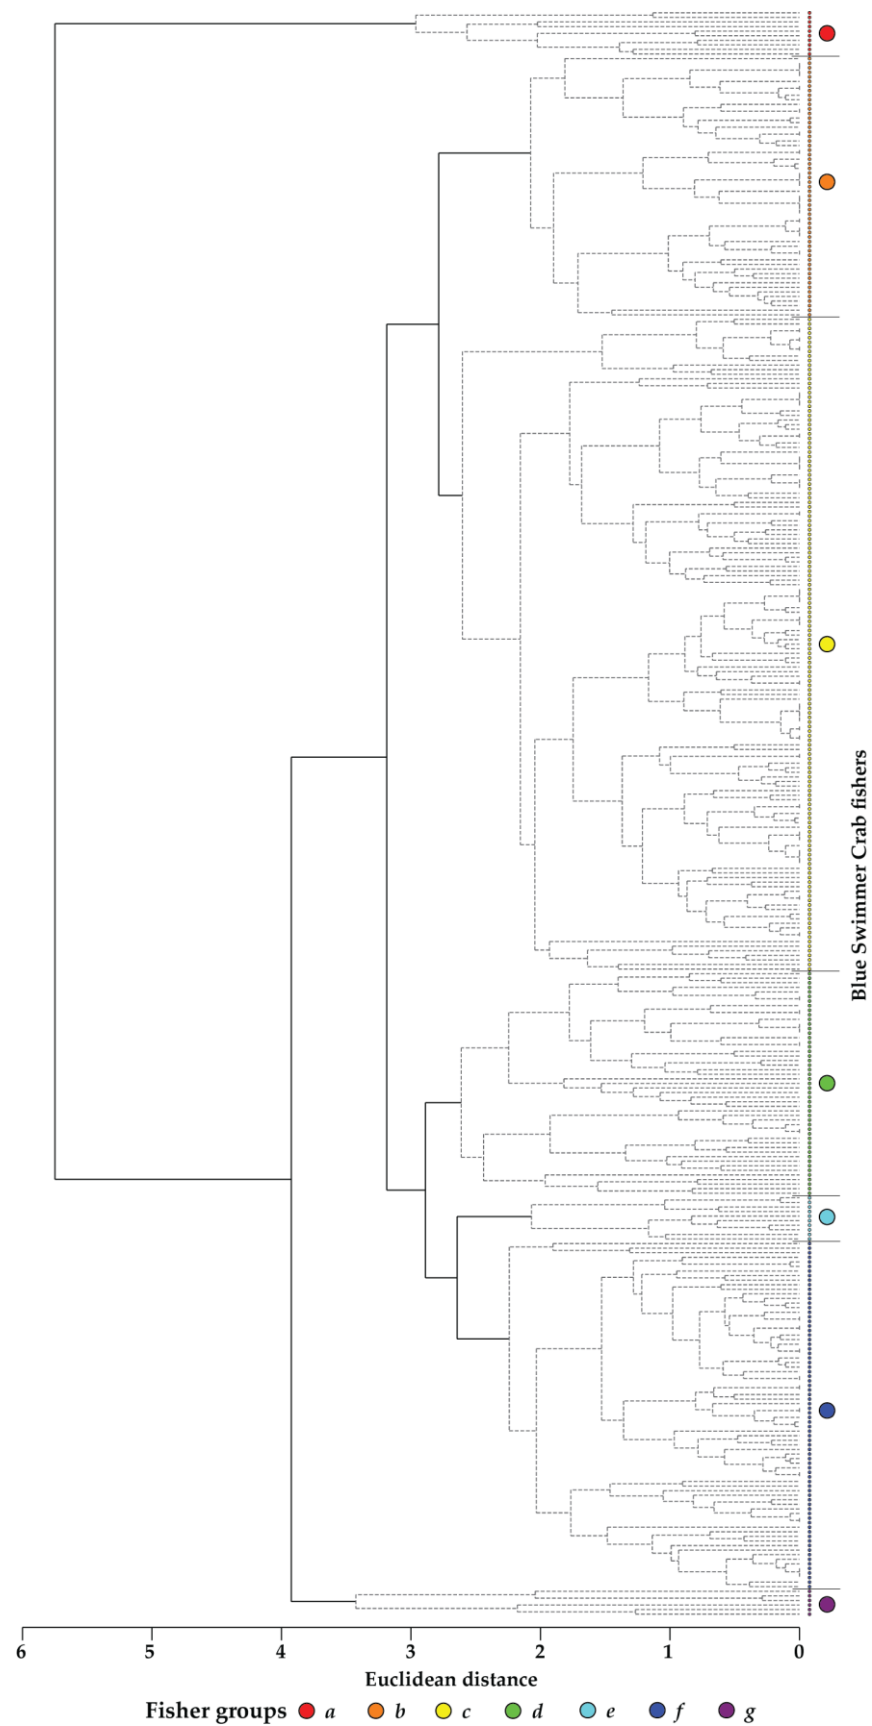

**Figure S1.** Dendrogram derived from CLUSTER-SIMPROF analysis of the fisher characteristics of Blue Swimmer Crab fishers. Samples joined by a dashed horizontal grey line represent fishers that were shown by SIMPROF to have statistically similar fisher characteristics ( $P > 0.01$ ), but to be significantly different from all those fishers in other fisher groups ( $P < 0.01$ ).

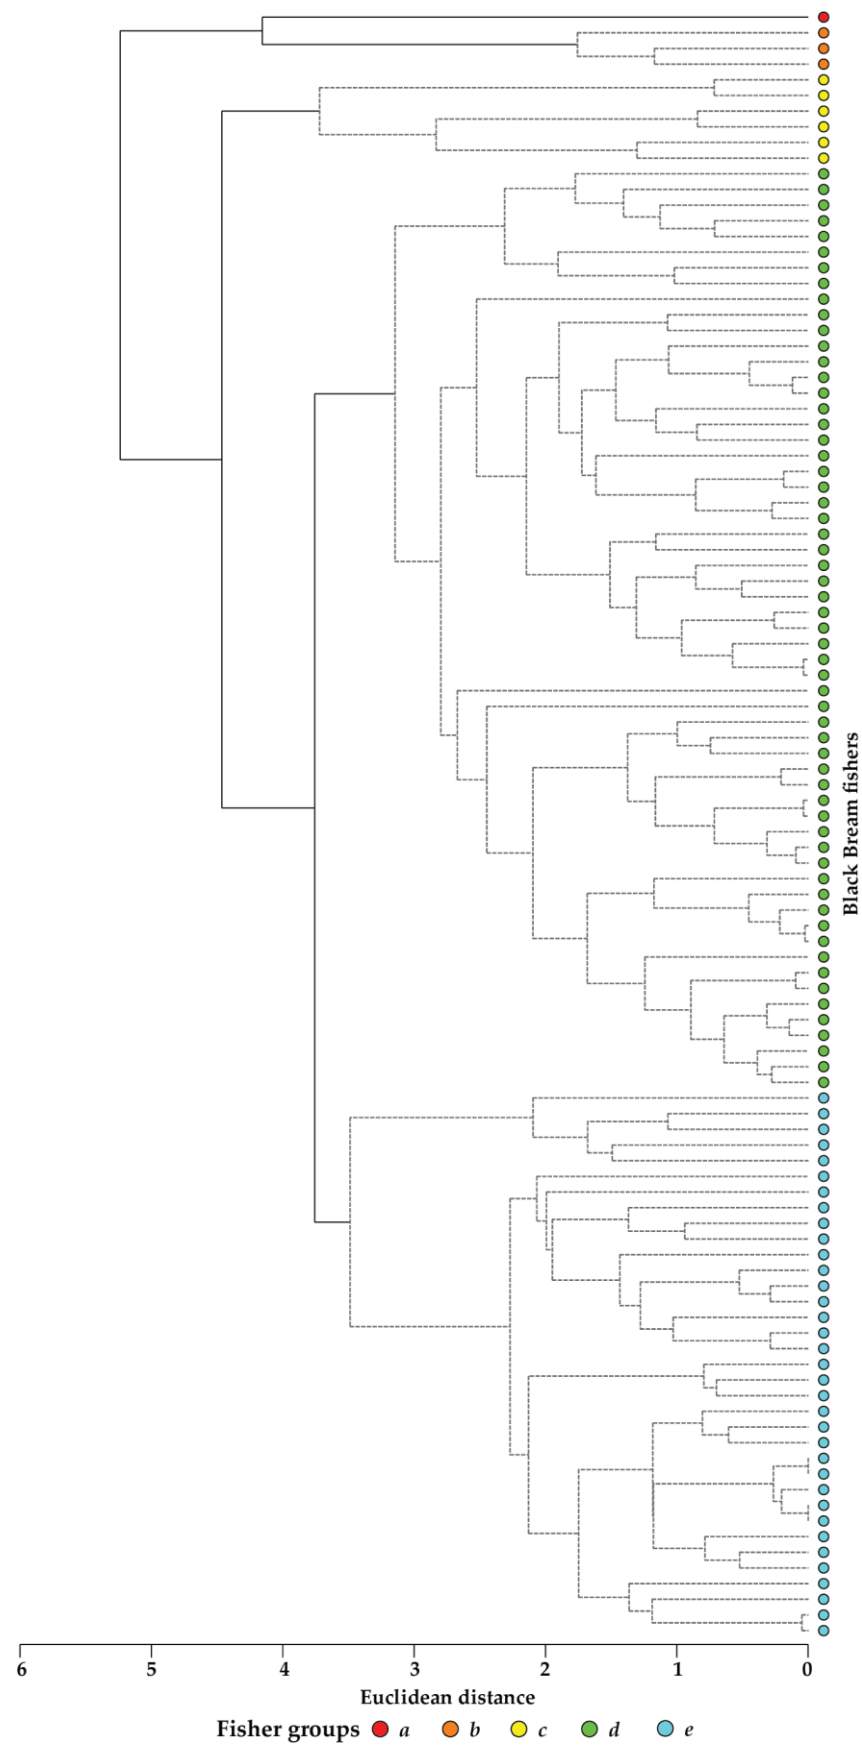

**Figure S2.** Dendrogram derived from CLUSTER-SIMPROF analysis of the fisher characteristics of Black Bream fishers. Samples joined by a dashed horizontal grey line represent fishers that were

shown by SIMPROF to have statistically similar fisher characteristics ( $P > 0.01$ ), but to be significantly different from all those fishers in other fisher groups ( $P < 0.01$ ).

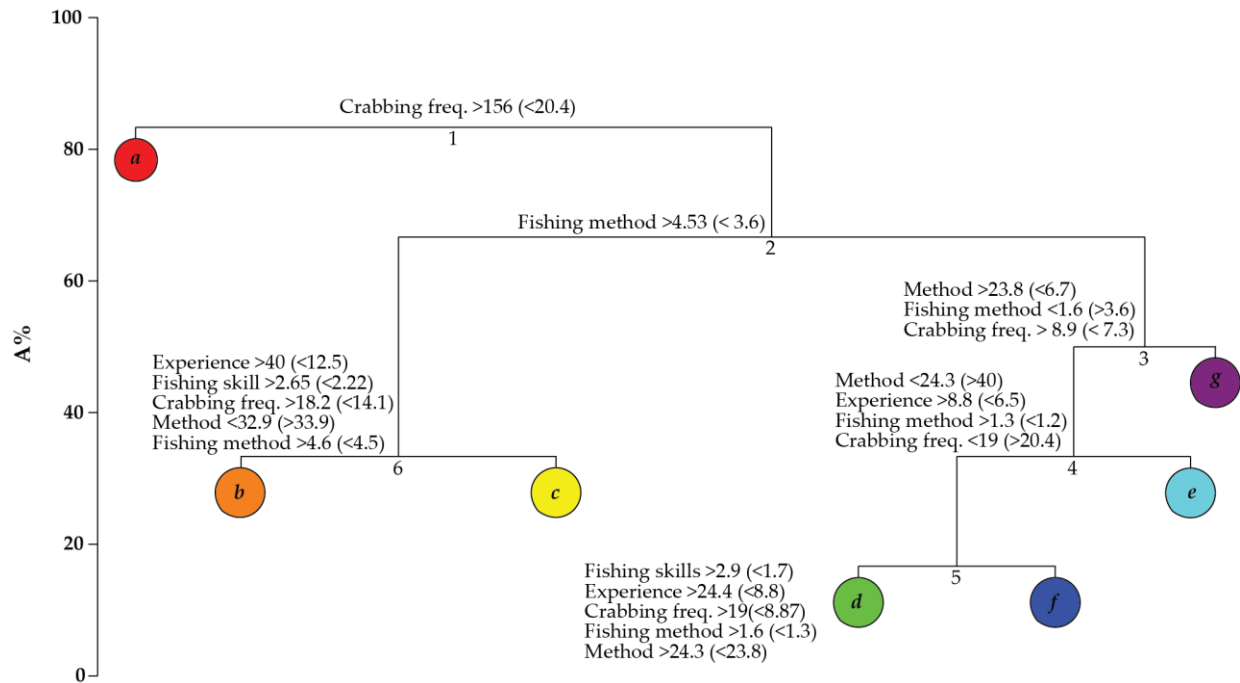

**Figure S3.** Linkage tree and associated quantitative thresholds for assigning Blue Swimmer Crab fishers to their appropriate fisher group. Unbracketed and bracketed thresholds given at each branching node indicate that a left or right path should be followed, respectively. Note that all threshold values have not been subjected to any form of data pre-treatment. The terminal node represented by a coloured symbol denotes the fisher group to which any new fisher (or sample) belongs. A% reflects the extent of inter-fisher group differences as a proportion of that between the most dissimilar fisher groups.

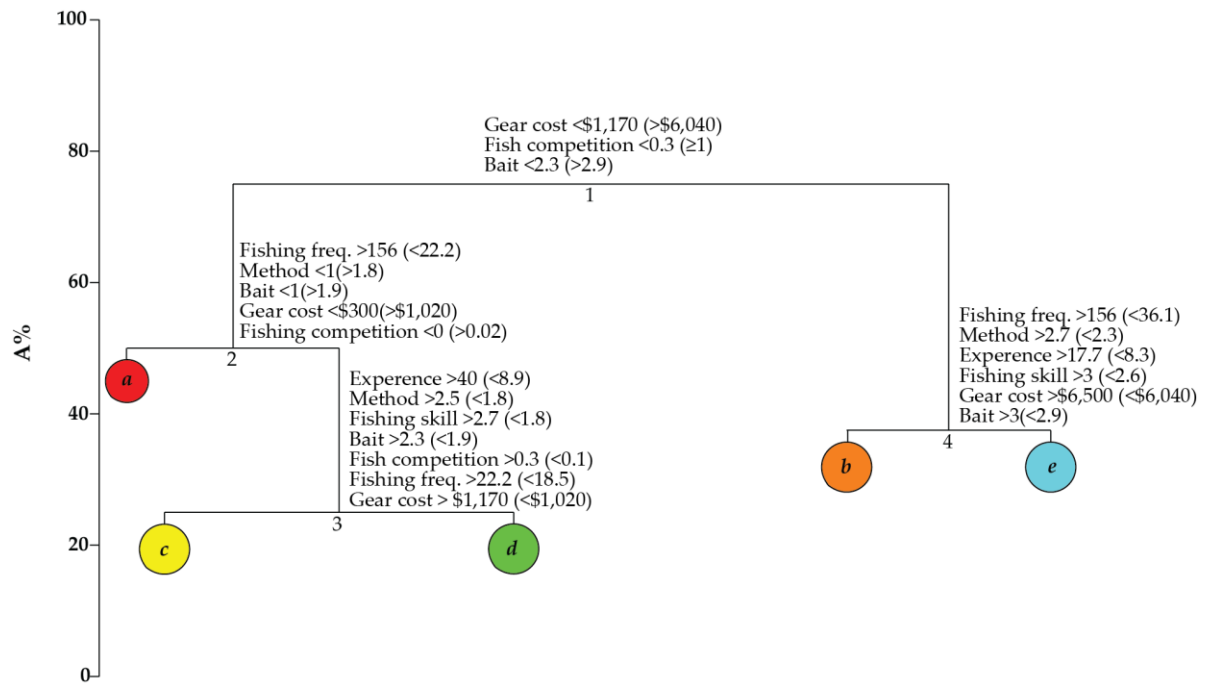

**Figure S4.** Linkage tree and associated quantitative thresholds for assigning Black Bream fishers to their appropriate fisher group. Unbracketed and bracketed thresholds given at each branching node indicate that a left or right path should be followed, respectively. Note that all threshold values have not been subjected to any form of data pre-treatment. The terminal node represented by a coloured symbol denotes the fisher group to which any new fisher (or sample) belongs. A% reflects the extent of inter-fisher group differences as a proportion of that between the most dissimilar fisher groups.

**Table S3.** Percentage number of times a salient motivation for (a) Blue Swimmer Crab and (b) Black Bream fishing was selected from the closed-question online survey. Percentages given for all fishers targeting the species (overall), for those fishers utilising a particular fishery and allocated to a fisher group. Values in both (a) and (b) shaded separately, with values in dark red being the lowest and those in dark green the highest. Note respondents were able to select as many motivations as they deemed appropriate. The CLUSTER-SIMPROF groups assigned are given below. Fisheries or fisher groups with the same letter indicate no significant difference in the percentage contribution across the possible answers, whereas those with different letters are deemed to be different. In this and other tables, average responses from Black Bream fishers utilising Wilson Inlet and those in fisher group *a* were not subjected to CLUSTER-SIMPROF analysis due to them having very small numbers of respondents. Peel = Peel-Harvey Estuary; Swan = Swan-Canning Estuary; Lesch = Leschenault Estuary; Shark = Shark Bay; Black. = Blackwood River Estuary; Wilson = Wilson Inlet.

| (a) Blue Swimmer Crabs |         | Fishery |      |      |        |       |  | Fisher group |          |          |          |          |          |          |
|------------------------|---------|---------|------|------|--------|-------|--|--------------|----------|----------|----------|----------|----------|----------|
|                        | Overall |         | Peel | Swan | Lesch. | Shark |  | <i>a</i>     | <i>b</i> | <i>c</i> | <i>d</i> | <i>e</i> | <i>f</i> | <i>g</i> |
| Food                   | 92      |         | 93   | 94   | 91     | 86    |  | 100          | 95       | 96       | 92       | 100      | 90       | 60       |
| Enjoyment of catch     | 67      |         | 71   | 69   | 67     | 71    |  | 30           | 75       | 70       | 71       | 50       | 64       | 60       |
| Enjoyment of outdoors  | 65      |         | 72   | 67   | 58     | 57    |  | 50           | 68       | 71       | 71       | 70       | 70       | 20       |
| Pleasure               | 65      |         | 69   | 70   | 61     | 57    |  | 50           | 84       | 72       | 65       | 50       | 59       | 40       |
| Time with family       | 51      |         | 57   | 47   | 52     | 57    |  | 30           | 67       | 56       | 41       | 20       | 51       | 60       |
| Time with friends      | 48      |         | 51   | 56   | 36     | 43    |  | 20           | 54       | 58       | 45       | 30       | 45       | 0        |
| CLUSTER-SIMPROF group  |         |         | a    | a    | a      | a     |  | a            | b        | b        | b        | a        | b        | c        |

  

| (b) Black Bream                            |         | Fishery |        |      |      |        |       | Fisher group |          |          |          |          |          |
|--------------------------------------------|---------|---------|--------|------|------|--------|-------|--------------|----------|----------|----------|----------|----------|
|                                            | Overall |         | Black. | Peel | Swan | Wilson | Other |              | <i>a</i> | <i>b</i> | <i>c</i> | <i>d</i> | <i>e</i> |
| Sport / Challenge                          | 81      |         | 83     | 88   | 83   | 100    | 77    |              | 100      | 67       | 83       | 69       | 100      |
| Enjoyment of outdoors                      | 67      |         | 72     | 50   | 65   | 100    | 80    |              | 100      | 67       | 67       | 73       | 66       |
| Pleasure                                   | 64      |         | 56     | 56   | 60   | 100    | 83    |              | 100      | 67       | 67       | 73       | 54       |
| Relaxation                                 | 63      |         | 56     | 63   | 62   | 100    | 70    |              | 0        | 67       | 50       | 71       | 51       |
| Enjoyment of catching a big fish           | 58      |         | 56     | 50   | 57   | 100    | 67    |              | 100      | 100      | 67       | 59       | 54       |
| Time with friends/family                   | 39      |         | 33     | 44   | 40   | 100    | 37    |              | 0        | 0        | 33       | 47       | 26       |
| Food                                       | 15      |         | 6      | 19   | 14   | 0      | 17    |              | 0        | 0        | 50       | 19       | 6        |
| Easy access to boat ramp and fishing sites | 12      |         | 17     | 6    | 8    | 0      | 20    |              | 0        | 0        | 17       | 14       | 9        |
| CLUSTER-SIMPROF group                      |         |         | a      | a    | a    |        | a     |              |          | a        | a        | a        | a        |

**Table S4.** Average rating (X) and standard error (SE) from -3 to +3 for each salient motivation for (a) Blue Swimmer Crab and (b) Black Bream fishing provided in the closed-question online survey. Average rating values in both (a) and (b) shaded separately, with values in dark red being the lowest and those in dark green the highest. The CLUSTER-SIMPROF groups assigned are given below. Fisheries or fisher groups with the same letter indicate no significant difference in the percentage contribution across the possible answers, whereas those with different letters are deemed to be different.

| (a) Blue Swimmer Crabs                            | Fishery |      |  |       |      |       |      |        |      |       |      |  | Fisher group |      |       |      |       |      |       |      |       |      |       |      |       |      |
|---------------------------------------------------|---------|------|--|-------|------|-------|------|--------|------|-------|------|--|--------------|------|-------|------|-------|------|-------|------|-------|------|-------|------|-------|------|
|                                                   | Overall |      |  | Peel  |      | Swan  |      | Lesch. |      | Shark |      |  | a            |      | b     |      | c     |      | d     |      | e     |      | f     |      | g     |      |
|                                                   | X       | SE   |  | X     | SE   | X     | SE   | X      | SE   | X     | SE   |  | X            | SE   | X     | SE   | X     | SE   | X     | SE   | X     | SE   | X     | SE   | X     | SE   |
| Catching enough crabs to eat                      | 1.89    | 0.06 |  | 1.98  | 0.08 | 1.89  | 0.10 | 1.90   | 0.26 | 2.50  | 0.30 |  | 2.20         | 0.47 | 2.04  | 0.12 | 1.87  | 0.11 | 2.00  | 0.18 | 2.11  | 0.29 | 1.83  | 0.19 | 1.00  | 1.11 |
| Catching big crabs                                | 1.89    | 0.05 |  | 1.86  | 0.07 | 1.96  | 0.09 | 2.11   | 0.18 | 2.40  | 0.32 |  | 2.00         | 0.63 | 2.12  | 0.14 | 1.86  | 0.11 | 1.98  | 0.19 | 2.38  | 0.24 | 1.77  | 0.17 | 1.00  | 0.96 |
| Being with friends/family is enough               | 1.52    | 0.06 |  | 1.59  | 0.08 | 1.46  | 0.10 | 0.78   | 0.33 | 1.33  | 0.20 |  | 2.00         | 0.49 | 1.46  | 0.16 | 1.50  | 0.11 | 1.08  | 0.24 | 1.57  | 0.40 | 1.64  | 0.15 | 1.75  | 0.39 |
| Being outdoors is enough                          | 1.44    | 0.06 |  | 1.46  | 0.09 | 1.31  | 0.10 | 0.96   | 0.32 | 0.40  | 0.54 |  | 2.14         | 0.50 | 1.32  | 0.14 | 1.35  | 0.12 | 1.36  | 0.24 | 1.11  | 0.40 | 1.64  | 0.13 | 2.00  | 0.58 |
| Catching as many crabs as I am legally allowed to | 0.43    | 0.09 |  | 0.64  | 0.12 | 0.37  | 0.14 | 0.19   | 0.34 | -0.17 | 0.76 |  | 1.25         | 0.77 | 0.52  | 0.25 | 0.35  | 0.16 | 0.62  | 0.29 | 0.60  | 0.76 | 0.13  | 0.24 | -1.67 | 0.62 |
| Catching some crabs                               | -0.57   | 0.09 |  | -0.52 | 0.13 | -0.32 | 0.15 | -0.77  | 0.35 | -0.83 | 0.85 |  | -1.25        | 0.86 | -0.64 | 0.28 | -0.41 | 0.17 | -0.62 | 0.32 | -1.22 | 0.74 | -0.39 | 0.26 | -2.20 | 0.73 |
| CLUSTER-SIMPROF group                             |         |      |  | a     |      | a     |      | a      |      | a     |      |  | a            |      | b     |      | b     |      | b     |      | b     |      | b     |      | c     |      |

| (b) Black Bream                                   | Fishery |      |  |        |      |       |      |       |      |        |    |       | Fisher group |  |       |    |       |      |       |      |       |      |       |      |
|---------------------------------------------------|---------|------|--|--------|------|-------|------|-------|------|--------|----|-------|--------------|--|-------|----|-------|------|-------|------|-------|------|-------|------|
|                                                   | Overall |      |  | Black. |      | Peel  |      | Swan  |      | Wilson |    | Other |              |  | a     |    | b     |      | c     |      | d     |      | e     |      |
|                                                   | X       | SE   |  | X      | SE   | X     | SE   | X     | SE   | X      | SE | X     | SE           |  | X     | SE | X     | SE   | X     | SE   | X     | SE   | X     | SE   |
| Catching a big bream (> 30 cm)                    | 2.33    | 0.13 |  | 2.53   | 0.36 | 2.92  | 0.08 | 2.40  | 0.15 | -2.00  |    | 2.08  | 0.29         |  | 3.00  |    | 3.00  | 0.00 | 2.60  | 0.24 | 2.37  | 0.16 | 2.24  | 0.28 |
| Having a relaxing day                             | 1.70    | 0.15 |  | 1.15   | 0.80 | 2.07  | 0.29 | 1.78  | 0.15 | 2.00   |    | 1.80  | 0.31         |  |       |    | 0.33  | 1.76 | 1.20  | 0.49 | 2.09  | 0.14 | 1.39  | 0.34 |
| Catching a legal sized bream (25 cm)              | 1.64    | 0.15 |  | 2.06   | 0.30 | 2.00  | 0.27 | 1.67  | 0.22 | 1.00   |    | 1.33  | 0.36         |  | -2.00 |    | 1.67  | 0.88 | 1.00  | 1.00 | 1.59  | 0.20 | 1.88  | 0.34 |
| Being outdoors is enough                          | 1.44    | 0.16 |  | 0.44   | 0.69 | 2.36  | 0.28 | 1.57  | 0.15 | 3.00   |    | 1.57  | 0.29         |  | 2.00  |    | -0.33 | 1.33 | 1.80  | 0.37 | 1.94  | 0.14 | 1.08  | 0.37 |
| Catching a bream no matter the size               | 1.08    | 0.19 |  | -0.38  | 0.74 | 2.07  | 0.28 | 1.31  | 0.24 | 3.00   |    | 0.88  | 0.32         |  | -3.00 |    | 1.33  | 0.88 | 0.33  | 0.56 | 1.17  | 0.25 | 1.74  | 0.32 |
| Being with friends/family is enough               | 1.07    | 0.21 |  | 0.58   | 0.79 | 1.44  | 0.73 | 1.18  | 0.22 | 2.00   |    | 1.15  | 0.42         |  |       |    | -3.00 |      | 2.25  | 0.48 | 1.27  | 0.24 | 1.17  | 0.49 |
| Good weather conditions                           | 0.63    | 0.19 |  | 0.58   | 0.72 | 1.57  | 0.65 | 0.55  | 0.25 | -1.00  |    | 0.73  | 0.34         |  | -2.00 |    | 0.67  | 1.20 | -0.25 | 0.75 | 0.96  | 0.24 | 0.38  | 0.41 |
| Catching as many bream as I am legally allowed to | -0.94   | 0.23 |  | 0.57   | 0.69 | -0.30 | 0.70 | -1.50 | 0.29 | -3.00  |    | -0.83 | 0.42         |  | -3.00 |    | 0.00  | 1.73 | -1.25 | 0.25 | -1.30 | 0.31 | -0.42 | 0.49 |
| CLUSTER-SIMPROF group                             |         |      |  | a      |      | b     |      | c     |      |        |    | c     |              |  |       |    | a     |      | a     |      | a     |      | a     |      |

**Table S5.** Percentage number of times (a) Blue Swimmer Crab and (b) Black Bream fishers eat, release and give away legal-sized individuals that they catch. Percentages given for all fishers targeting the species (overall), for those fishers utilising a particular fishery and allocated to a fisher group. Values in both (a) and (b) shaded separately, with values in dark red being the lowest and those in dark green the highest. The CLUSTER-SIMPROF groups assigned are given below. Fisheries or fisher groups with the same letter indicate no significant difference in the percentage contribution across the possible answers, whereas those with different letters are deemed to be different.

| (a) Blue Swimmer Crabs |         |  | Fishery |      |        |       |  | Fisher group |          |          |          |          |          |          |
|------------------------|---------|--|---------|------|--------|-------|--|--------------|----------|----------|----------|----------|----------|----------|
| Eat them               | Overall |  | Peel    | Swan | Lesch. | Shark |  | <i>a</i>     | <i>b</i> | <i>c</i> | <i>d</i> | <i>e</i> | <i>f</i> | <i>g</i> |
| Always                 | 91      |  | 93      | 92   | 90     | 100   |  | 80           | 95       | 96       | 90       | 90       | 84       | 83       |
| Sometimes              | 8       |  | 7       | 7    | 10     | 0     |  | 20           | 4        | 4        | 10       | 10       | 14       | 0        |
| Never                  | 1       |  | 1       | 1    | 0      | 0     |  | 0            | 2        | 0        | 0        | 0        | 3        | 17       |
| CLUSTER-SIMPROF group  |         |  | a       | a    | a      |       |  | a            | b        | b        | b        | b        | b        | c        |
| Release after capture  |         |  |         |      |        |       |  |              |          |          |          |          |          |          |
| Always                 | 2       |  | 2       | 0    | 0      | 0     |  | 0            | 5        | 0        | 0        | 11       | 3        | 20       |
| Sometimes              | 68      |  | 69      | 67   | 55     | 67    |  | 60           | 54       | 68       | 69       | 78       | 78       | 80       |
| Never                  | 31      |  | 29      | 33   | 45     | 33    |  | 40           | 40       | 32       | 31       | 11       | 19       | 0        |
| CLUSTER-SIMPROF group  |         |  | a       | a    | b      |       |  | a            | a        | a        | a        | b        | b        | b        |
| Give away              |         |  |         |      |        |       |  |              |          |          |          |          |          |          |
| Always                 | 8       |  | 7       | 9    | 15     | 0     |  | 20           | 7        | 7        | 6        | 0        | 7        | 0        |
| Sometimes              | 75      |  | 73      | 76   | 55     | 100   |  | 60           | 79       | 76       | 78       | 60       | 70       | 83       |
| Never                  | 18      |  | 20      | 16   | 30     | 0     |  | 20           | 16       | 17       | 16       | 40       | 22       | 17       |
| CLUSTER-SIMPROF group  |         |  | a       | a    | b      |       |  | a            | b        | b        | b        | c        | b        | b        |

| (b) Black Bream       |         | Fishery |        |      |      |        | Fisher group |  |     |     |    |    |    |
|-----------------------|---------|---------|--------|------|------|--------|--------------|--|-----|-----|----|----|----|
| Eat them              | Overall |         | Black. | Peel | Swan | Wilson | Other        |  | a   | b   | c  | d  | e  |
| Always                | 9       |         | 9      | 8    | 2    | 0      | 23           |  | 0   | 0   | 33 | 12 | 0  |
| Sometimes             | 27      |         | 45     | 8    | 30   | 0      | 23           |  | 0   | 0   | 33 | 40 | 9  |
| Never                 | 64      |         | 45     | 83   | 69   | 100    | 54           |  | 100 | 100 | 33 | 48 | 91 |
| CLUSTER-SIMPROF group |         |         | a      | a    | a    |        | a            |  |     | a   | b  | b  | a  |
| Release after capture |         |         |        |      |      |        |              |  |     |     |    |    |    |
| Always                | 76      |         | 83     | 83   | 76   | 100    | 67           |  | 100 | 100 | 33 | 66 | 94 |
| Sometimes             | 23      |         | 17     | 17   | 22   | 0      | 33           |  | 0   | 0   | 67 | 32 | 6  |
| Never                 | 1       |         | 0      | 0    | 2    | 0      | 0            |  | 0   | 0   | 0  | 2  | 0  |
| CLUSTER-SIMPROF group |         |         | a      | a    | a    |        | a            |  |     | a   | c  | b  | a  |
| Give away             |         |         |        |      |      |        |              |  |     |     |    |    |    |
| Always                | 2       |         | 0      | 8    | 2    | 0      | 0            |  | 0   | 0   | 17 | 0  | 3  |
| Sometimes             | 13      |         | 18     | 0    | 7    | 0      | 31           |  | 0   | 0   | 0  | 21 | 6  |
| Never                 | 85      |         | 82     | 92   | 91   | 100    | 69           |  | 100 | 100 | 83 | 79 | 91 |
| CLUSTER-SIMPROF group |         |         | a      | a    | a    |        | a            |  |     | a   | a  | a  | a  |

**Table S6.** Percentage number of times (a) Blue Swimmer Crab and (b) Black Bream fishers catch, fewer target individuals than allowed (i.e. the bag limit), the number allows, more than allowed and multiple options. Percentages given for all fishers targeting the species (overall), for those fishers utilising a particular fishery and allocated to a fisher group. Values in both (a) and (b) shaded separately, with values in dark red being the lowest and those in dark green the highest. The CLUSTER-SIMPROF groups assigned are given below. Fisheries or fisher groups with the same letter indicate no significant difference in the percentage contribution across the possible answers, whereas those with different letters are deemed to be different.

| (a) Blue Swimmer Crabs                |         |  | Fishery |      |        |       |  | Fisher group |    |    |    |     |    |     |
|---------------------------------------|---------|--|---------|------|--------|-------|--|--------------|----|----|----|-----|----|-----|
|                                       | Overall |  | Peel    | Swan | Lesch. | Shark |  | a            | b  | c  | d  | e   | f  | g   |
| Catch fewer crabs than allowed        |         |  |         |      |        |       |  |              |    |    |    |     |    |     |
| Always                                | 31      |  | 28      | 33   | 55     | 0     |  | 50           | 14 | 33 | 22 | 40  | 41 | 50  |
| Sometimes                             | 67      |  | 70      | 65   | 40     | 100   |  | 50           | 86 | 65 | 67 | 60  | 59 | 50  |
| Never                                 | 1       |  | 1       | 1    | 0      | 0     |  | 0            | 0  | 1  | 6  | 0   | 0  | 0   |
| Don't know                            | 1       |  | 0       | 1    | 5      | 0     |  | 0            | 0  | 1  | 4  | 0   | 0  | 0   |
| CLUSTER-SIMPROF group                 |         |  | a       | a    | b      |       |  | a            | d  | b  | d  | c   | c  | a   |
| As many crabs as the limit allows     |         |  |         |      |        |       |  |              |    |    |    |     |    |     |
| Always                                | 12      |  | 9       | 14   | 10     | 17    |  | 40           | 12 | 10 | 14 | 10  | 9  | 17  |
| Sometimes                             | 72      |  | 79      | 72   | 50     | 83    |  | 40           | 77 | 74 | 76 | 70  | 69 | 50  |
| Never                                 | 16      |  | 12      | 15   | 40     | 0     |  | 20           | 11 | 16 | 10 | 20  | 20 | 33  |
| Don't know                            | 0       |  | 0       | 0    | 0      | 0     |  | 0            | 0  | 0  | 0  | 0   | 1  | 0   |
| CLUSTER-SIMPROF group                 |         |  | a       | a    | a      |       |  | a            | b  | c  | b  | c   | c  | d   |
| More crabs than allowed               |         |  |         |      |        |       |  |              |    |    |    |     |    |     |
| Always                                | 0       |  | 0       | 1    | 0      | 0     |  | 0            | 0  | 0  | 0  | 0   | 0  | 0   |
| Sometimes                             | 37      |  | 26      | 23   | 47     | 25    |  | 0            | 0  | 1  | 0  | 0   | 3  | 0   |
| Never                                 | 1       |  | 1       | 2    | 0      | 0     |  | 0            | 2  | 3  | 2  | 0   | 0  | 0   |
| Don't know                            | 61      |  | 72      | 75   | 53     | 75    |  | 100          | 98 | 96 | 98 | 100 | 97 | 100 |
| CLUSTER-SIMPROF group                 |         |  | a       | a    | b      |       |  | a            | a  | a  | a  | a   | a  | a   |
| All of the above depending on the day |         |  |         |      |        |       |  |              |    |    |    |     |    |     |
| Always                                | 5       |  | 5       | 6    | 0      | 0     |  | 0            | 8  | 3  | 11 | 10  | 3  | 0   |
| Sometimes                             | 23      |  | 24      | 25   | 20     | 67    |  | 40           | 29 | 25 | 17 | 20  | 18 | 20  |
| Never                                 | 42      |  | 44      | 42   | 50     | 33    |  | 30           | 53 | 39 | 46 | 40  | 45 | 20  |
| Don't know                            | 30      |  | 27      | 28   | 30     | 0     |  | 30           | 10 | 33 | 26 | 30  | 34 | 60  |
| CLUSTER-SIMPROF group                 |         |  | a       | a    | b      |       |  | a            | a  | a  | a  | a   | a  | a   |

| (b) Black Bream                              |         | Fishery |        |      |      |        | Fisher group |  |     |     |     |     |     |
|----------------------------------------------|---------|---------|--------|------|------|--------|--------------|--|-----|-----|-----|-----|-----|
|                                              | Overall |         | Black. | Peel | Swan | Wilson | Other        |  | a   | b   | c   | d   | e   |
| <b>Catch fewer fish than allowed</b>         |         |         |        |      |      |        |              |  |     |     |     |     |     |
| Always                                       | 73      |         | 58     | 55   | 80   | 100    | 70           |  | 100 | 33  | 83  | 73  | 74  |
| Sometimes                                    | 4       |         | 0      | 9    | 5    | 0      | 0            |  | 0   | 0   | 0   | 2   | 6   |
| Never                                        | 16      |         | 25     | 36   | 11   | 0      | 15           |  | 0   | 67  | 0   | 14  | 20  |
| Don't know                                   | 8       |         | 17     | 0    | 4    | 0      | 15           |  | 0   | 0   | 17  | 12  | 0   |
| CLUSTER-SIMPROF group                        |         |         | a      | a    | a    |        | a            |  |     | a   | a   | a   | a   |
| <b>As many fish as the limit allows</b>      |         |         |        |      |      |        |              |  |     |     |     |     |     |
| Always                                       | 4       |         | 8      | 0    | 5    | 0      | 0            |  | 0   | 0   | 0   | 5   | 3   |
| Sometimes                                    | 1       |         | 0      | 0    | 2    | 0      | 0            |  | 0   | 0   | 0   | 0   | 0   |
| Never                                        | 85      |         | 83     | 100  | 82   | 100    | 85           |  | 100 | 67  | 83  | 81  | 94  |
| Don't know                                   | 10      |         | 8      | 0    | 11   | 0      | 15           |  | 0   | 33  | 17  | 14  | 3   |
| CLUSTER-SIMPROF group                        |         |         | a      | a    | a    |        | a            |  |     | a   | a   | a   | a   |
| <b>More fish than allowed</b>                |         |         |        |      |      |        |              |  |     |     |     |     |     |
| Always                                       | 0       |         | 0      | 0    | 0    | 0      | 0            |  | 0   | 0   | 0   | 0   | 0   |
| Sometimes                                    | 1       |         | 0      | 0    | 2    | 0      | 0            |  | 0   | 0   | 0   | 0   | 0   |
| Never                                        | 99      |         | 100    | 100  | 98   | 100    | 100          |  | 100 | 100 | 100 | 100 | 100 |
| Don't know                                   | 0       |         | 0      | 0    | 0    | 0      | 0            |  | 0   | 0   | 0   | 0   | 0   |
| CLUSTER-SIMPROF group                        |         |         | a      | a    | a    |        | a            |  |     | a   | a   | a   | a   |
| <b>All of the above depending on the day</b> |         |         |        |      |      |        |              |  |     |     |     |     |     |
| Always                                       | 1       |         | 0      | 9    | 0    | 0      | 0            |  | 0   | 0   | 17  | 0   | 0   |
| Sometimes                                    | 14      |         | 18     | 0    | 20   | 0      | 8            |  | 0   | 33  | 0   | 16  | 9   |
| Never                                        | 74      |         | 73     | 82   | 67   | 100    | 85           |  | 100 | 67  | 50  | 70  | 89  |
| Don't know                                   | 11      |         | 9      | 9    | 13   | 0      | 8            |  | 0   | 0   | 33  | 14  | 3   |
| CLUSTER-SIMPROF group                        |         |         | a      | a    | a    |        | a            |  |     | a   | b   | a   | a   |

**Table S7.** Perceived importance of (a) Blue Swimmer Crab and (b) Black Bream fishing to fishers that target those species and the percentage of fishers that would undertake different substitute activities if their target species could no longer be fished in the estuary they fish most regularly in. Percentages given for all fishers targeting the species (overall), for those fishers utilising a particular fishery and allocated to a fisher group. Values in both (a) and (b) shaded separately, with values in dark red being the lowest and those in dark green the highest. The CLUSTER-SIMPROF groups assigned are given below. Fisheries or fisher groups with the same letter indicate no significant difference in the percentage contribution across the possible answers, whereas those with different letters are deemed to be different.

| (a) Blue Swimmer Crabs                                                                                         |         |  | Fishery |      |        |       |  | Fisher group |    |    |    |    |    |    |
|----------------------------------------------------------------------------------------------------------------|---------|--|---------|------|--------|-------|--|--------------|----|----|----|----|----|----|
|                                                                                                                | Overall |  | Peel    | Swan | Lesch. | Shark |  | a            | b  | c  | d  | e  | f  | g  |
| Compared to other types of fishing, how important is crabbing to you?                                          |         |  |         |      |        |       |  |              |    |    |    |    |    |    |
| Much more important                                                                                            | 19      |  | 19      | 22   | 47     | 17    |  | 56           | 28 | 19 | 11 | 11 | 17 | 17 |
| More important                                                                                                 | 27      |  | 27      | 31   | 5      | 50    |  | 11           | 28 | 28 | 32 | 22 | 24 | 17 |
| The same importance                                                                                            | 50      |  | 50      | 45   | 37     | 33    |  | 22           | 44 | 51 | 51 | 56 | 53 | 67 |
| Less important                                                                                                 | 3       |  | 2       | 2    | 5      | 0     |  | 11           | 0  | 1  | 6  | 0  | 4  | 0  |
| Much less important                                                                                            | 1       |  | 1       | 0    | 5      | 0     |  | 0            | 0  | 1  | 0  | 11 | 3  | 0  |
| CLUSTER-SIMPROF group                                                                                          |         |  | a       | a    | b      |       |  | a            | b  | b  | b  | b  | b  | b  |
| Compared to other types of outdoor recreation, how important is crabbing to you?                               |         |  |         |      |        |       |  |              |    |    |    |    |    |    |
| Much more important                                                                                            | 17      |  | 16      | 20   | 30     | 17    |  | 50           | 20 | 18 | 15 | 0  | 14 | 0  |
| More important                                                                                                 | 30      |  | 32      | 37   | 35     | 67    |  | 10           | 32 | 35 | 31 | 40 | 20 | 33 |
| The same importance                                                                                            | 44      |  | 43      | 36   | 25     | 17    |  | 40           | 46 | 40 | 46 | 40 | 47 | 33 |
| Less important                                                                                                 | 9       |  | 8       | 7    | 10     | 0     |  | 0            | 2  | 7  | 8  | 20 | 18 | 0  |
| Much less important                                                                                            | 1       |  | 0       | 1    | 0      | 0     |  | 0            | 0  | 0  | 0  | 0  | 1  | 33 |
| CLUSTER-SIMPROF group                                                                                          |         |  | a       | a    | a      |       |  | a            | b  | b  | b  | b  | b  | c  |
| If crabbing was not available in the estuary where you fish most often, what would you most likely do instead? |         |  |         |      |        |       |  |              |    |    |    |    |    |    |
| Fish for Blue Swimmer Crabs elsewhere                                                                          | 58      |  | 60      | 62   | 42     | 67    |  | 67           | 65 | 54 | 59 | 70 | 53 | 50 |
| Fish a different species in the same estuary                                                                   | 19      |  | 20      | 17   | 32     | 17    |  | 11           | 15 | 20 | 17 | 20 | 25 | 0  |
| Do a different water-based outdoor activity                                                                    | 15      |  | 14      | 14   | 16     | 17    |  | 22           | 15 | 22 | 9  | 0  | 10 | 33 |
| Take on a different land-based outdoor activity                                                                | 4       |  | 3       | 3    | 0      | 0     |  | 0            | 4  | 2  | 9  | 10 | 4  | 17 |
| Loss of the fishery will not affect me                                                                         | 4       |  | 2       | 3    | 11     | 0     |  | 0            | 2  | 2  | 7  | 0  | 8  | 0  |
| CLUSTER-SIMPROF group                                                                                          |         |  | a       | a    | b      |       |  | a            | a  | a  | a  | a  | a  | b  |

| (b) Black Bream                                                                                                     |         |  | Fishery |      |      |        |       |   | Fisher group |     |    |    |    |  |
|---------------------------------------------------------------------------------------------------------------------|---------|--|---------|------|------|--------|-------|---|--------------|-----|----|----|----|--|
|                                                                                                                     | Overall |  | Black.  | Peel | Swan | Wilson | Other |   | a            | b   | c  | d  | e  |  |
| Compared to other types of fishing, how important is bream fishing to you?                                          |         |  |         |      |      |        |       |   |              |     |    |    |    |  |
| Much more important                                                                                                 | 23      |  | 8       | 27   | 22   | 100    | 26    |   | 100          | 100 | 33 | 22 | 74 |  |
| More important                                                                                                      | 30      |  | 17      | 27   | 35   | 0      | 30    |   | 0            | 0   | 33 | 29 | 14 |  |
| The same importance                                                                                                 | 43      |  | 58      | 45   | 42   | 0      | 41    |   | 0            | 0   | 33 | 42 | 11 |  |
| Less important                                                                                                      | 3       |  | 17      | 0    | 0    | 0      | 4     |   | 0            | 0   | 0  | 5  | 0  |  |
| Much less important                                                                                                 | 1       |  | 0       | 0    | 2    | 0      | 0     |   | 0            | 0   | 0  | 2  | 0  |  |
| CLUSTER-SIMPROF group                                                                                               |         |  |         | a    | b    | b      |       | b |              | b   | a  | a  | b  |  |
| Compared to other types of outdoor recreation, how important is bream fishing to you?                               |         |  |         |      |      |        |       |   |              |     |    |    |    |  |
| Much more important                                                                                                 | 44      |  | 58      | 55   | 38   | 100    | 44    |   | 100          | 67  | 33 | 24 | 77 |  |
| More important                                                                                                      | 37      |  | 17      | 18   | 42   | 0      | 44    |   | 0            | 33  | 33 | 49 | 20 |  |
| The same importance                                                                                                 | 12      |  | 0       | 18   | 16   | 0      | 7     |   | 0            | 0   | 33 | 15 | 3  |  |
| Less important                                                                                                      | 4       |  | 17      | 9    | 0    | 0      | 4     |   | 0            | 0   | 0  | 7  | 0  |  |
| Much less important                                                                                                 | 3       |  | 8       | 0    | 4    | 0      | 0     |   | 0            | 0   | 0  | 5  | 0  |  |
| CLUSTER-SIMPROF group                                                                                               |         |  |         | a    | a    | a      |       | a |              | a   | a  | a  | a  |  |
| If bream fishing was not available in the estuary where you fish most often, what would you most likely do instead? |         |  |         |      |      |        |       |   |              |     |    |    |    |  |
| Fish for Black Bream elsewhere                                                                                      | 63      |  | 58      | 82   | 67   | 0      | 50    |   | 100          | 100 | 50 | 48 | 86 |  |
| Fish a different species in the same estuary                                                                        | 30      |  | 33      | 9    | 27   | 100    | 38    |   | 0            | 0   | 17 | 43 | 11 |  |
| Take on a different land-based outdoor activity                                                                     | 4       |  | 8       | 0    | 4    | 0      | 4     |   | 0            | 0   | 0  | 5  | 3  |  |
| Do a different water-based outdoor activity                                                                         | 3       |  | 0       | 9    | 2    | 0      | 4     |   | 0            | 0   | 33 | 2  | 0  |  |
| Loss of the fishery will not affect me                                                                              | 1       |  | 0       | 0    | 0    | 0      | 4     |   | 0            | 0   | 0  | 2  | 0  |  |
| CLUSTER-SIMPROF group                                                                                               |         |  |         | a    | b    | a      |       | a |              | a   | b  | b  | a  |  |
